# Supplementary material for: Does the combination of exercise and cognitive training improve working memory in older adults? A systematic review and meta-analysis
Source: PeerJ. 2023 Apr 10;11:e15108. doi: 10.7717/peerj.15108 (PMC10100799; doi:10.7717/peerj.15108)
Supplement: Supplemental Information 1 [file peerj-11-15108-s001.xlsx]

## Sheet: Sheet2
Study	Working Memory Task	ECT						CG(no intervention group)						CT						ET
		Mean		SD		N		Mean		SD		N		Mean		SD		N		Mean		SD		N
		pre	post	pre	post			pre	post	pre	post			pre	post	pre	post			pre	post	pre	post
Fabre 2002
	WMS-LM I	6.2	8.4	3.11	2.55	8		7	7.7	4.24	4.24	8		7.9	10.5	3.11	2.55	8		6.1	7.4	2.26	2.83	8
You 2009
	Memory recall task	18.75	50.06	16.36	16.47	8		30	45	6.84	14.25	5
Legault 2011
	1-Back	0.84	0.89	0.12	0.14	18		0.87	0.93	0.13	0.06	17		0.88	1	0.08	0.25	16		0.89	0.92	0.14	0.08	16
	2-Back	0.57	0.62	0.19	0.18	18		0.48	0.61	0.22	0.19	17		0.6	0.62	0.17	0.28	16		0.55	0.57	0.21	0.18	16
Maillot 2012
	Spatial Span Test	0.33		1.4		15		-0.27		1.28		15
	Backwards Spatial Span Test	0.07		1.67		15		0.27		0.96		15
Suzuki 2012
	WMS-LM I	3.83		5.86		25		0.6		5.96		25
Shatil 2013
	Auditory working memory test	﹣0.21	0	0.82	0.74	29		﹣0.26	﹣0.17	1.17	0.62	29		﹣0.06	0.08	0.93	0.08	33		﹣0.28	﹣0.08	0.93	0.64	31
Nishiguchi 2015
	WMS-LM I	17.3	22	4.5	5.9	24		20	21.3	7.7	7.8	24
	1-back (face + location)	90.2	94.3	9.8	4.8	24		92.9	95.9	5.1	3.3	24
	1-back (face)	87.8	94.3	11.4	5.8	24		90	94.8	7	4.5	24
	1-back (location)	92.6	9.8	94.2	7.3	24		95.8	97	4.7	3.4	24
Rahe 2015
	WAIS-II, DSB	6.68	7.68	2.46	2.56	25								6.8	7.41	2.02	2.11	20
Gschwind 2015
	Digit Span Backward	6	6.1	2.3	2.1	78		5.9	5.7	2.3	2.5	75
Schättin 2016
	Working memory test	895.955	770.805	334.465	214.283	13														783.731	810.125	155.852	165.16	14
Eggenberger 2016
	Working memory test	9.79	10.84	6.05	4.79	19														8.93	10.57	4.87	3.29	14
Ordnung 2017
	n-back	23.7292		78.0854		14		-65.9663		119.775		15
Damirchi 2017
	Forward Digit Span test	7.3	8.37	2.01	2.93	13		6.66	6.44	2.44	2.24	9		7.9	9.45	2.47	2.65	11		7.9	7.81	2.34	2.08	11
Kalbe 2018
	WAIS-II, DSB	6.78	8.06	2.69	2.58	18								6.88	7.82	1.5	2.27	17
Bae 2019
	Corsi block-tapping task	0.27		1.08		41		-0.28		1.03		42
Donnezan 2018
	Digit span b	4.1	4.95	1.18	1.12	21		3.86	3.79	0.86	0.97	14		4.06	4.63	0.68	1.09	18		4.22	4.72	1.06	1.18	16
Karssemeijer 2019
	Digit span	10.2	10.1	2.8	2.9	38		11.2	10.8	3.9	4	39								11.1	10.8	2.8	2.8	38
Dana 2019
	Working Memory Task	22.17	26.83	5.7	4.68	12		23.08	23.83	6.14	5.6	12		22.25	24.92	5.32	5.1	12		21.75	24.67	5.84	5.17	12
Norouzi 2019
	n-back	6.19	7.82	0.13	0.15	20		6.23	6.87	0.21	0.16	20
Adcock 2020
	The digit span backward task	5	5.91	0.57	0.43	15		6.17	6.04	0.42	0.64	16
Takeuchi 2020
	2-back	73.52	90	114.47	53.73	30								73.52	88.52	113.98	62.71	30		74.68	76.45	115.81	117.94	33
	Digit span	13.9	14.87	14.79	16.6	30								14.2	15	16.71	15.12	30		12.76	14.52	16.49	18.33	33
	Logical memory	25.37	26.07	37.51	35.6	30								22.41	26.69	33.52	36.2	30		21.39	23.67	37.8	45.21	33
